# Supplementary material for: Genomic characterization of NDM-1 and 5, and OXA-181 carbapenemases in uropathogenic Escherichia coli isolates from Riyadh, Saudi Arabia
Source: PLoS One. 2018 Aug 15;13(8):e0201613. doi: 10.1371/journal.pone.0201613 (PMC6093660; doi:10.1371/journal.pone.0201613)
Supplement: S5 Table — (XLSX) [file pone.0201613.s006.xlsx]

## Sheet: S2 Table
S5 Table. The distribution of key virulence factors among the studied UPEC isolates
	UPEC-RIY-1	UPEC-RIY-2	UPEC-RIY-3	UPEC-RIY-4	UPEC-RIY-5	UPEC-RIY-6	UPEC-RIY-7	UPEC-RIY-8	UPEC-RIY-9	UPEC-RIY-10
Iron System
enterobactin siderophore (entABCDEFS)	Y	Y	Y	Y	Y	Y	Y	Y	Y	Y
Heme uptake system (chuSTUVWXY)	Y	Y	N	N	N	N	N	N	N	N
Aerobactin siderophore (iutA)	Y	Y	N	N	N	N	Y	Y	Y	Y
Yersiniabactin siderophore (fyuA)	Y	Y	N	N	N	N	Y	Y	Y	Y
Iron/manganese transport (sit)	N	N	N	N	N	N	N	N	N	N
Salmochelin siderophore (iro)	N	N	N	N	N	N	N	N	N	N
Pili
fim (type 1) (fimABCDFEGHI)	Y	Y	Y	Y	Y	Y	Y	Y	Y	Y
pap (P)	Y	Y	N	N	N	N	N	N	N	N
sfA (S)	Y	Y	N	N	N	N	N	N	N	N
foc (F1C)	Y	Y	N	N	N	N	Y	Y	Y	Y
Toxins
secreted autotransporter toxin (sat)	Y	Y	N	N	N	N	N	N	N	N
enterotoxin (senB)	Y	Y	N	N	N	N	N	N	N	N
α-hemolysin (hly)	N	N	N	N	N	N	N	N	N	N
cytotoxic necrotizing factor-1 (cnf-1)	N	N	N	N	N	N	N	N	N	N
vacuolating autotransporter toxin (vat)	N	N	N	N	N	N	N	N	N	N
Y; Presence
N; Absence
